# Supplementary material for: Chronic Stress-Induced Gene Changes In Vitro and In Vivo: Potential Biomarkers Associated With Depression and Cancer Based on circRNA- and lncRNA-Associated ceRNA Networks
Source: Front Oncol. 2021 Sep 28;11:744251. doi: 10.3389/fonc.2021.744251 (PMC8507324; doi:10.3389/fonc.2021.744251)
Supplement: Supplementary file 4 [file Table_6.xlsx]

## Sheet: Sheet1
ProbeName	pvalues	foldchange	D1	D2	D3	D4	D5	D6	C1	C2	C3	C4	C5	C6	ProbeName	Type	ProbeSeq	Accession	Source	Chromosome	Strand	Start	End	GeneSymbol	Gene_ID	Description	GO	Relation	Associated_gene	Associated_gene_description	Associated_gene_strand
LNCV6_137105_PI430048170	0.0277251	3.98552	1.42427	4.42124	3.59358	3.33312	1.39368	3.78435	1.43766	1.38054	1.38191	1.36344	1.39614	1.37828	LNCV6_137105_PI430048170	mRNA	TTCTGGCTTACCGATACAACAACCAATACATCTTTGTTCTGTAATGTAAAATTTGACTCC	NM_014244	RefSeq	chr5	-	179110850	179345430	ADAMTS2	9509	ADAM metallopeptidase with thrombospondin type 1 motif, 2, transcript variant 1	GO:0030324|GO:0005578|GO:0005576|GO:0007283|GO:0016485|GO:0030198|GO:0030199|GO:0030574|GO:0006508|GO:0008270|GO:0043588|GO:0004222|GO:0008237	.	NA	-	.
LNCV6_113651_PI430048170	0.00608845	3.82303	6.31524	7.29913	9.05802	7.71733	6.73288	7.31215	6.10392	6.63609	5.42677	3.99229	5.64761	5.60234	LNCV6_113651_PI430048170	mRNA	TCCTCAGGGACAGAATTCAACGCCGTCAAATCTCTCATATTGGGAAAGGTTTTAGAGGCT	NM_033655	RefSeq	chr9	-	39072766	39288303	CNTNAP3	79937	contactin associated protein-like 3	GO:0008037|GO:0005886|GO:0005576|GO:0016021|GO:0007155	.	NA	-	.
LNCV6_134862_PI430048170	0.0196096	3.81719	5.57421	6.26054	4.19779	4.55978	2.96626	3.76658	2.22553	2.16841	3.47891	2.77213	3.11903	3.73597	LNCV6_134862_PI430048170	mRNA	GACTCATGATGCTGGATATGAAGAACTATTGACTTCTTGGGAAAAAACGGAGAAATATTA	NM_139249	RefSeq	chr11	+	60334881	60340968	MS4A6E	245802	membrane-spanning 4-domains, subfamily A, member 6E	GO:0016021	.	NA	-	.
LNCV6_41248_PI430048170	0.0498929	3.52536	3.52682	2.64205	2.74003	3.10277	5.90742	2.74087	3.11863	1.26558	2.72455	1.44537	1.80129	2.13288	LNCV6_41248_PI430048170	mRNA	CAGAGCTGGAATTGTGTGGGGTTTAGTGCTAAATACTTCAATAAAGTCTGTTTTTTGTGA	NM_001142569	RefSeq	chr1	+	200894820	200915736	C1orf106	55765	chromosome 1 open reading frame 106, transcript variant 2	NA	.	NA	-	.
LNCV6_80757_PI430048170	0.0282703	3.40527	7.04474	8.07943	10.2583	8.86496	7.7697	7.74662	6.85785	7.35872	7.00144	5.06392	7.29034	7.167	LNCV6_80757_PI430048170	mRNA	TTCAATTTCGAACGTGGAACAGAGCAGGACATTTGCTTTTCGGCGAACTTCAACGTGGTT	NM_001201380	RefSeq	chr9	-	41891889	42129504	CNTNAP3B	728577	contactin associated protein-like 3B	GO:0016021|GO:0007155	.	NA	-	.
LNCV6_136074_PI430048170	0.0169652	3.20372	5.61948	5.68527	5.69954	5.99159	7.474	4.35928	4.58404	4.75886	4.46169	4.54625	4.10106	3.97908	LNCV6_136074_PI430048170	mRNA	CAAAAGCAAATAAATGCAGACAAACAAACCAAGACCAAAGGCTCTTTTTAGAGCCACCCA	NM_003517	RefSeq	chr1	+	149886974	149887411	HIST2H2AC	8338	histone cluster 2, H2ac	GO:0008150|GO:0003674|GO:0046982|GO:0005634|GO:0000786|GO:0003677|GO:0070062	.	NA	-	.
LNCV6_129183_PI430048170	0.03087	3.05112	1.51496	3.01514	3.37936	2.84745	4.87838	3.36537	1.60703	2.38554	1.45538	1.94641	2.08835	1.70169	LNCV6_129183_PI430048170	mRNA	CAAGGTGTTCTTTTGTGTCCTCTATTTTCTTCTTGTGAACTGTTAAAGCTACATGCATTA	NM_003817	RefSeq	chr8	+	24440995	24509564	ADAM7	8756	ADAM metallopeptidase domain 7	GO:0005886|GO:0006508|GO:0008270|GO:0016021|GO:0004222	.	NA	-	.
LNCV6_137212_PI430048170	0.0247067	2.94257	3.53262	2.80435	2.44424	2.90514	5.17041	2.74148	2.04043	1.33221	2.98387	1.23652	2.52194	1.36201	LNCV6_137212_PI430048170	mRNA	GCGTGAAGCAGGCCCAAGCTAGGGAAGGTGAGAAGCTTTAACCTTAAATTTTCGAGTTTT	NM_182610	RefSeq	chr3	+	169911571	169939168	SAMD7	344658	sterile alpha motif domain containing 7, transcript variant 2	NA	.	NA	-	.
LNCV6_137456_PI430048170	0.00146812	2.86002	2.74604	3.11815	2.82864	3.64565	4.27209	2.66987	1.35731	1.35454	1.29598	1.599	2.64799	2.12107	LNCV6_137456_PI430048170	mRNA	CTTTTGATTGCACAAGCCTTTGTTTTCAGTCCTAGTGAATAAAGTTGTGTTTTCTGGAAA	NM_014353	RefSeq	chr16	+	2148649	2154140	RAB26	25837	RAB26, member RAS oncogene family	GO:0005515|GO:0009306|GO:0005886|GO:0043001|GO:0031226|GO:0003924|GO:0005525|GO:0006904|GO:0006184|GO:0045055|GO:0000139|GO:0035272|GO:0017157|GO:0032482|GO:0019003|GO:0019002|GO:0030667|GO:0005768|GO:0030658	.	NA	-	.
LNCV6_133604_PI430048170	0.0345421	2.79458	3.47349	3.05337	2.81325	3.29825	5.61066	3.68012	1.85427	1.46888	3.28414	2.58635	2.17938	3.06894	LNCV6_133604_PI430048170	mRNA	TGAGTTTGAACTTGGAAGGAGAATGGCATTATCTATAGAGGCTGATGCAGGAGAGACCCA	NM_020160	RefSeq	chr19	-	47403117	47419528	MEIS3	56917	Meis homeobox 3, transcript variant 1	GO:0043565|GO:0051897|GO:0001077|GO:2001234|GO:0045944|GO:0003682|GO:0005634	.	NA	-	.
LNCV6_135816_PI430048170	0.00853502	2.67398	4.98122	5.92788	6.47232	6.03426	4.63934	6.23277	4.63815	3.58344	4.44859	3.04272	4.97002	4.97423	LNCV6_135816_PI430048170	mRNA	CCCGATGTTCTTGATTTTCCCAGAGAAGCAAATAAACAGCGTGAACAGCCCCAGAAAAAA	NM_002579	RefSeq	chr19	+	708952	748330	PALM	5064	paralemmin, transcript variant 1	GO:0005515|GO:0060160|GO:0030424|GO:0005886|GO:0072661|GO:0008360|GO:0031527|GO:0051491|GO:0006928|GO:0005634|GO:0007194|GO:0016327|GO:0060074|GO:0043231|GO:0016323|GO:0071257|GO:0032590|GO:0032591|GO:0005887|GO:0007010|GO:0016023|GO:0005654|GO:0060999|GO	.	NA	-	.
LNCV6_129572_PI430048170	0.0181092	2.60677	3.38457	4.29775	2.35211	3.01442	4.0602	2.0882	1.49752	2.80616	1.90071	2.49112	1.45366	1.44751	LNCV6_129572_PI430048170	mRNA	CTCTATCTTGGGTTTCTTAATTGCTTCCAAGCTTCCAAAGGCTCTTTTCAGAGCCACTTA	NM_003535	RefSeq	chr6	-	27890314	27890792	HIST1H3J	8356	histone cluster 1, H3j	GO:0005515|GO:0010467|GO:0046982|GO:0006325|GO:0006335|GO:0005576|GO:0005634|GO:0000228|GO:0003677|GO:0032776|GO:0043234|GO:0060968|GO:0016020|GO:0000183|GO:0007596|GO:0045814|GO:0040029|GO:0005654|GO:0000786|GO:0070062	.	NA	-	.
LNCV6_136457_PI430048170	0.0170046	2.53833	14.0533	13.7557	11.8868	13.8053	13.1571	12.4845	12.3873	12.4104	11.9826	11.7223	11.9018	11.5894	LNCV6_136457_PI430048170	mRNA	TGAAGGCTTTTTACCCAGCAATGTCCTCAATGAGGGTCTTTTCTTTCCCTCACCAAAACC	NM_005621	RefSeq	chr1	-	153373707	153375599	S100A12	6283	S100 calcium binding protein A12	GO:0005515|GO:0045576|GO:0050663|GO:0006805|GO:0005886|GO:0050832|GO:0005634|GO:0005829|GO:0005737|GO:0006954|GO:0051092|GO:0050786|GO:0043406|GO:0031640|GO:0005856|GO:0043123|GO:0042742|GO:0005507|GO:0005509|GO:0030593|GO:0005576|GO:0002548|GO:0045087|GO	.	NA	-	.
LNCV6_137939_PI430048170	0.0182433	2.50603	3.69149	3.65979	4.56782	4.16054	5.75477	3.66275	3.0187	3.22893	3.01347	3.17499	3.65699	2.63172	LNCV6_137939_PI430048170	mRNA	TCCAGAAACTTGGAGAAATGGGGGTTGGGAACTTATGCAGACATGGATTTATTTTTCAAC	NM_173587	RefSeq	chr11	-	63911220	63916844	RCOR2	283248	REST corepressor 2	GO:0005667|GO:0003700|GO:0003714|GO:0003682|GO:0005634|GO:0045892|GO:0003677|GO:0000785|GO:0006351	.	NA	-	.
LNCV6_135811_PI430048170	0.0230132	2.40519	7.41824	7.19479	5.90461	7.79232	6.77966	6.02428	6.2739	6.4398	4.60146	6.24436	5.26702	4.25212	LNCV6_135811_PI430048170	mRNA	AAATAAGGAGCCAGAGGAGTTACCTGTGTCCTGCATTATGATTAAAGCCTTTTAAAGTTG	NM_145038	RefSeq	chr2	+	26401915	26456711	DRC1	92749	dynein regulatory complex subunit 1	GO:0071973|GO:0060285|GO:0005930|GO:0070286|GO:0005856	.	NA	-	.
LNCV6_133366_PI430048170	0.0108975	2.35156	16.4854	16.8315	15.5691	15.4443	15.9825	14.883	15.0845	14.9777	14.8705	14.3882	14.6979	14.5291	LNCV6_133366_PI430048170	mRNA	ATGAAAAGGTCATAGAACACATCATGGAGGACCTGGACACAAATGCAGACAAGCAGCTGA	NM_002965	RefSeq	chr1	+	153357853	153361027	S100A9	6280	S100 calcium binding protein A9	GO:0005515|GO:0008017|GO:0035662|GO:0050544|GO:0005886|GO:0030307|GO:0045471|GO:0050832|GO:0007267|GO:0005634|GO:0001816|GO:0005615|GO:0010043|GO:0005829|GO:0051092|GO:0006954|GO:0050786|GO:0032602|GO:0032496|GO:0004871|GO:0005856|GO:0042742|GO:0070062|GO	.	NA	-	.
LNCV6_136061_PI430048170	0.00940056	2.32851	2.11479	3.11215	3.31907	2.80021	1.51083	3.17683	2.22386	1.17541	1.31599	1.20053	1.99453	1.17356	LNCV6_136061_PI430048170	mRNA	TGTGAACCCATCCAGAGTGTCTTCTTCTTCTCTGGAGACAAGTACTACCGAGTCAATCTT	NM_000638	RefSeq	chr17	-	28367277	28370352	VTN	7448	vitronectin	GO:0005515|GO:0030449|GO:0030949|GO:0033627|GO:0090303|GO:0010811|GO:0050731|GO:0072562|GO:0035987|GO:0005615|GO:0014911|GO:0032092|GO:0006955|GO:0030198|GO:0007155|GO:0008201|GO:0070062|GO:0005044|GO:0050840|GO:0005578|GO:0005576|GO:0006898|GO:0010951|GO	.	NA	-	.
LNCV6_137054_PI430048170	0.0404101	2.28	1.43094	3.70051	3.94149	3.61977	3.78693	2.98329	1.41673	2.39197	3.25019	1.98728	1.42373	2.1558	LNCV6_137054_PI430048170	mRNA	TGTTATCTATCTATCTATCTATATAACTATAACCACACGCCGTGTAGACACCCGCTGCCA	NM_145285	RefSeq	chr10	+	99532932	99536523	NKX2-3	159296	NK2 homeobox 3	GO:0048621|GO:0043367|GO:0005634|GO:0005575|GO:0050900|GO:0048536|GO:0006351|GO:0048535|GO:0043565|GO:0003674|GO:0008150|GO:0048541|GO:0045944|GO:0042127|GO:0002317|GO:0006641|GO:0030225|GO:0042475|GO:0022612|GO:0001776	.	NA	-	.
LNCV6_129137_PI430048170	0.000454138	2.25868	2.79363	2.21565	2.98068	2.90188	3.33258	2.83463	1.37511	2.49326	1.35301	1.6959	1.40527	1.52673	LNCV6_129137_PI430048170	mRNA	TGGGGGATTGAGAGTCAGAAGGATTATACAGCTTGTTCAAATTATAAATAAAAGCCCTGA	NM_207412	RefSeq	chr8	-	38510833	38528662	C8orf86	NA	chromosome 8 open reading frame 86, transcript variant 1	NA	.	NA	-	.
LNCV6_131807_PI430048170	0.00365965	2.24985	4.43215	4.83234	5.00936	4.03079	4.21379	3.85411	3.40747	3.66029	2.69332	2.61449	4.05955	2.5834	LNCV6_131807_PI430048170	mRNA	TGGTCATCTTTTTCTCTAAAATAGCCACTTACCTTCAATAAAGTATCTACATGCGGTGAA	NM_003235	RefSeq	chr8	+	132866959	133134899	TG	7038	thyroglobulin	GO:0052689|GO:0042403|GO:0007165|GO:0005179|GO:0042446|GO:0031641|GO:0005576|GO:0030878|GO:0015705|GO:0005615	.	NA	-	.
LNCV6_137316_PI430048170	0.0403716	2.23369	2.33188	2.56139	3.39386	4.17236	4.53561	3.84493	2.5834	2.33795	2.99812	2.84175	2.45631	1.48266	LNCV6_137316_PI430048170	mRNA	ATTGCTGGGGTCTATTACTTCACCTACCACATCACTGTTTTCTCCAGGAATGTTCAGGTG	NM_001007537	RefSeq	chr13	-	23891098	23897006	C1QTNF9B	387911	C1q and tumor necrosis factor related protein 9B, transcript variant 1	GO:0005581|GO:0070062	.	NA	-	.
LNCV6_127889_PI430048170	0.00305137	2.20563	12.7881	13.759	13.1911	12.2925	12.9589	12.362	11.7141	11.4894	11.9479	11.311	12.2814	12.0699	LNCV6_127889_PI430048170	mRNA	TTTCTAGAGGGAGGAATGGGTGTTTGAGTGCAGAGACACTGGTCTGGGGTGATCCATGGA	NM_021250	RefSeq	chr19_KI270938v1_alt	-	289466	295523	LILRA5	353514	leukocyte immunoglobulin-like receptor, subfamily A (with TM domain), member 5, transcript variant 1	GO:0045087|GO:0016021|GO:0070062	.	NA	-	.
LNCV6_58935_PI430048170	0.0314519	2.17905	3.04769	5.05982	3.79773	3.22089	3.57223	2.89553	2.66214	2.07137	3.0413	3.06478	2.67317	2.35771	LNCV6_58935_PI430048170	mRNA	AAAGATTTTCTGCACATTAAAGAGAAGTACAGCAATGACTGGTGGATCGGGCGGCTAGTG	NM_000725	RefSeq	chr12	+	48818470	48828943	CACNB3	784	calcium channel, voltage-dependent, beta 3 subunit, transcript variant 1	GO:0050852|GO:0051899|GO:0005245|GO:0019901|GO:0007268|GO:0008331|GO:0005891|GO:0005829|GO:0016324|GO:0016020|GO:0007411|GO:0007528|GO:0070588|GO:0006810|GO:0006816	.	NA	-	.
LNCV6_74597_PI430048170	0.0211476	2.16442	3.32207	3.8574	5.06266	3.41329	4.5117	3.35757	3.7615	3.17576	2.09926	2.29797	2.64581	3.15313	LNCV6_74597_PI430048170	mRNA	ATGGATGATATGGATGATGAAGATGATGATGACCATGTGGACAGCCAGGACTCCATTGAC	NM_001251830	RefSeq	chr4	+	87975649	87983411	SPP1	6696	secreted phosphoprotein 1, transcript variant 5	GO:0005515|GO:0048471|GO:0007566|GO:0010811|GO:0030593|GO:0050840|GO:0045177|GO:0033280|GO:0005576|GO:0042995|GO:0048545|GO:0005125|GO:0005615|GO:0031214|GO:0001649|GO:0048685|GO:0046697|GO:0006954|GO:0022617|GO:0045780|GO:0030198|GO:0007155|GO:0070062	.	NA	-	.
LNCV6_143346_PI430048170	0.0386821	2.13329	5.22491	5.77303	5.45096	5.36509	3.77177	4.02069	4.11986	4.23106	4.02078	3.84126	3.60472	4.17825	LNCV6_143346_PI430048170	mRNA	TGACAATTTCGTGAAGCTCATTTCATGGTACGACAACGAATATGGCTACAGTCACCGGGT	NM_014364	RefSeq	chr19	+	35533411	35545319	GAPDHS	26330	glyceraldehyde-3-phosphate dehydrogenase, spermatogenic	GO:0050661|GO:0005515|GO:0005975|GO:0006094|GO:0097228|GO:0005634|GO:0004365|GO:0030317|GO:0044281|GO:0006096|GO:0005829|GO:0051287|GO:0035686|GO:0009405|GO:0006006|GO:0045821|GO:0055114	.	NA	-	.
LNCV6_136328_PI430048170	0.0351963	2.0987	4.33968	3.91246	3.83268	4.86243	3.18949	4.24834	1.38161	2.75836	1.40466	4.42317	3.08365	3.15771	LNCV6_136328_PI430048170	mRNA	TGCATTTCTTTTTATACTAAATATGTGACTGACAATAAAAACAATTTTGACTTTAAAAAA	NM_175617	RefSeq	chr16	+	56625672	56627113	MT1E	4493	metallothionein 1E	GO:0071294|GO:0048471|GO:0005737|GO:0008270|GO:0005634|GO:0071276|GO:0045926	.	NA	-	.
LNCV6_135653_PI430048170	0.0231224	2.08709	2.16983	2.52437	2.9308	2.61296	4.1774	2.68788	2.47582	1.20236	2.04518	2.32944	1.97266	1.20892	LNCV6_135653_PI430048170	mRNA	AAACTTACTAAGAATAACTCAGTCCTTGTAGACTCTAAAGGACAGGGGGAGGGAGAGGGA	NM_001171992	RefSeq	chr6	+	44000599	44005957	C6orf223	221416	chromosome 6 open reading frame 223, transcript variant 2	NA	.	NA	-	.
LNCV6_139437_PI430048170	0.0079621	2.08657	6.9037	6.7268	6.51935	6.65515	7.8969	6.19178	5.83575	5.43722	5.97088	6.03782	5.8588	5.97217	LNCV6_139437_PI430048170	mRNA	TTATGAGGAAACTCGCGGAGTGCTGAAAGTTTTCCTGGAAAATGTAATCCGCGATGCTGT	NM_003539	RefSeq	chr6	-	26188709	26189076	HIST1H4D	8360	histone cluster 1, H4d	GO:0005515|GO:0010467|GO:0006325|GO:0005634|GO:0045653|GO:0000723|GO:0000183|GO:0000786|GO:0070062|GO:0035574|GO:0035575|GO:0046982|GO:0006334|GO:0006335|GO:0005576|GO:0006336|GO:0000228|GO:0003677|GO:0032776|GO:0034080|GO:0043234|GO:0016020|GO:0045814|GO	.	NA	-	.
LNCV6_82940_PI430048170	0.0157946	2.08551	7.9723	8.28518	9.17816	8.59619	9.49321	7.81104	7.60608	7.80047	7.99531	6.87129	7.97599	7.17791	LNCV6_82940_PI430048170	mRNA	ACATGTACGACATCTTCAACTTGAATGACAAGGCTTTGTGCTTCACCAAGTGCAGGCAGT	NM_170776	RefSeq	chr16	+	57668244	57689378	ADGRG3	NA	adhesion G protein-coupled receptor G3	NA	.	NA	-	.
LNCV6_110990_PI430048170	0.0266406	2.07953	2.2618	2.71367	1.89517	1.22021	3.41385	2.39929	1.20964	1.1894	1.17843	1.76713	1.81669	1.16905	LNCV6_110990_PI430048170	mRNA	TTTTCTCCAGAGGAAAGCGATTCTACTTTCTCCAAAAGTACTGCCACAGAAGTAGCTCGG	NM_016426	RefSeq	chr22	+	46296740	46330810	GTSE1	51512	G-2 and S-phase expressed 1	GO:0005515|GO:0005881|GO:0003674|GO:0016020|GO:0007017|GO:0006977	.	NA	-	.
LNCV6_99943_PI430048170	0.0193314	2.0591	2.64416	2.85501	3.38145	3.2249	4.04492	3.73387	3.01347	1.16841	1.17119	2.70024	2.47996	2.57925	LNCV6_99943_PI430048170	mRNA	AGATAACCTTCATTGTGGAAGACGTCAACGACAATCCTGCCACATGCCAAAAGTTCACCT	NM_152750	RefSeq	chr7	+	105963210	106036431	CDHR3	222256	cadherin-related family member 3, transcript variant 1	GO:0005886|GO:0005509|GO:0016021|GO:0007156	.	NA	-	.
LNCV6_142481_PI430048170	0.00643926	2.05195	3.65699	3.80869	4.61147	4.76392	4.4785	3.82002	2.39994	2.77196	3.60496	2.83041	3.99618	3.09279	LNCV6_142481_PI430048170	mRNA	GACTCTTGTTCTTGTCTGATCTCTTGTCAAATTGTTATTTTGTAATGAACTGCGTCTCCT	NM_001136504	RefSeq	chr1	-	202590596	202643453	SYT2	127833	synaptotagmin II, transcript variant 2	GO:0005544|GO:0005515|GO:0005215|GO:0030054|GO:0042584|GO:0005886|GO:0005509|GO:0009405|GO:0006810|GO:0030672|GO:0016021|GO:0043231	.	NA	-	.
LNCV6_144495_PI430048170	0.0203898	2.05083	5.53721	6.08436	5.04507	5.01614	4.30251	4.32895	4.52276	4.17876	3.6775	4.29308	4.34296	3.72663	LNCV6_144495_PI430048170	mRNA	AAGAGTTACTTCGACAAGACGTTTCTATCTCTTCCCAGTACATTAAAATAAGGAAGCTGT	NM_001007232	RefSeq	chr11	-	105092468	105101431	CARD17	440068	caspase recruitment domain family, member 17	GO:0010951|GO:0005737|GO:0004869|GO:0042981	.	NA	-	.
LNCV6_138321_PI430048170	0.0270206	2.01894	3.31757	4.07013	3.46754	3.59366	5.00773	3.08902	3.17499	2.52183	3.3887	3.06516	2.86507	1.98641	LNCV6_138321_PI430048170	mRNA	GATTGGTACACAAAAGCTAAAGCAGTGGCTGGGGCTTTGTTTTTAAATTTTGGGTTTTTT	NM_058237	RefSeq	chr14_KI270847v1_alt	+	1288873	1394297	PPP4R4	57718	protein phosphatase 4, regulatory subunit 4, transcript variant 1	GO:0005515|GO:0008287|GO:0005737|GO:0019888|GO:0080163|GO:0032515	.	NA	-	.
LNCV6_143024_PI430048170	0.0263394	0.499507	3.52698	3.46492	3.38348	3.63577	1.41525	2.05231	4.45604	3.90271	3.55513	4.41756	4.23228	3.97985	LNCV6_143024_PI430048170	mRNA	CTGGATTCTGTTCAACTGTAATCAATGAAAAAGATGTACGTTGTAGACAAAGTTGCAGAA	NM_018027	RefSeq	chr10	-	13643705	14330867	FRMD4A	55691	FERM domain containing 4A	GO:0090162|GO:0005737|GO:0005923|GO:0030674|GO:0005856	.	NA	-	.
LNCV6_129938_PI430048170	0.0433008	0.494398	2.18521	1.64019	3.28824	1.97764	3.08357	2.02739	4.60062	2.83143	2.81138	2.52714	3.75756	3.45062	LNCV6_129938_PI430048170	mRNA	TTCTTGTCTATTTTAACCCGTCTGCTTCTAAATGATGTCTAGCTGCTTACCAACTTTAAA	NM_032803	RefSeq	chrX	-	70925579	70931125	SLC7A3	84889	solute carrier family 7 (cationic amino acid transporter, y+ system), member 3, transcript variant 1	GO:0005886|GO:0015181|GO:0006865|GO:0016021|GO:0015809|GO:0055085|GO:0015189|GO:0006811	.	NA	-	.
LNCV6_143458_PI430048170	0.0313969	0.493151	5.78436	4.58693	2.79834	3.95179	3.69805	4.51515	4.54355	6.09512	5.16887	5.80695	5.28037	5.81142	LNCV6_143458_PI430048170	mRNA	GGTTTTTTAAATTTTTTCAGTGAGCGTGGTGACTGCAGAGGTTAGTGCTGTGAAAAGCTG	NM_014141	RefSeq	chr7_KI270808v1_alt	+	2412	204591	CNTNAP2	26047	contactin associated protein-like 2	GO:0030424|GO:0008038|GO:0021987|GO:0019226|GO:0030425|GO:0031175|GO:0021794|GO:0008076|GO:0043025|GO:0043204|GO:0030534|GO:0007612|GO:0030673|GO:0007155|GO:0071109|GO:0005794|GO:0009986|GO:0044224|GO:0071625|GO:0021756|GO:0016020|GO:0045163|GO:0007420|GO	.	NA	-	.
LNCV6_144417_PI430048170	0.0141447	0.493042	6.57322	4.81657	5.97186	5.42815	5.2104	6.05059	6.38366	6.20802	6.1493	7.29587	7.48925	6.77123	LNCV6_144417_PI430048170	mRNA	TTACCTTTAACGTGAACTCACAGGCGGATTAAAGTGAAATAAAACCTACCATTTGAGTTA	NM_130848	RefSeq	chr5	-	135444213	135447348	DCANP1	140947	dendritic cell-associated nuclear protein	GO:0006355|GO:0005737|GO:0005634|GO:0003677|GO:0006351	.	NA	-	.
LNCV6_139341_PI430048170	0.0254156	0.492661	3.64235	4.15898	2.81992	3.75947	1.46261	3.12821	4.15757	4.27345	4.09141	4.88803	4.50851	4.33387	LNCV6_139341_PI430048170	mRNA	CCTGCATGTGGAAACATGAAGATGTTTTCACTTTGTGTCTAGGTTTATGTACGTGAACAA	NM_033053	RefSeq	chrX	-	72872024	72875788	DMRTC1	63947	DMRT-like family C1	GO:0000987|GO:0006355|GO:0003700|GO:0007548|GO:0005634|GO:0042803|GO:0006351	.	NA	-	.
LNCV6_127065_PI430048170	0.023686	0.486073	10.7203	10.7291	11.9961	10.7638	9.27248	10.9024	11.6085	11.4095	11.4055	11.9859	12.8362	12.0464	LNCV6_127065_PI430048170	mRNA	GCTGTACCCTCTGCCGATGGCATTTGTGTTTTTGATATTTGTGTCTGTTACTACTTTTTT	NM_002616	RefSeq	chr17	-	8140469	8152435	PER1	5187	period circadian clock 1	GO:0005634|GO:0051591|GO:0000989|GO:0005737|GO:0046329|GO:0009649|GO:0045944|GO:1900744|GO:0004871|GO:0019900|GO:0043153|GO:0031625|GO:0043124|GO:0070932|GO:0042634|GO:0070888|GO:0000122|GO:0000978|GO:2000323|GO:0006351|GO:0031490|GO:0032922|GO:0007165|GO	.	NA	-	.
LNCV6_127192_PI430048170	0.0260285	0.483516	5.08715	3.49492	3.70694	4.25196	2.29797	4.12397	4.38496	5.50814	5.24327	4.6932	4.59944	5.69683	LNCV6_127192_PI430048170	mRNA	CCGGTAAGATTTTATTGGTGTTTCTTTTATAACTTTGCAGTTCTTACACCGTTTGGTGAT	NM_021624	RefSeq	chr18	+	24460628	24479957	HRH4	59340	histamine receptor H4, transcript variant 1	GO:0008150|GO:0006954|GO:0007186|GO:0005886|GO:0043408|GO:0016021|GO:0004969|GO:0007204	.	NA	-	.
LNCV6_134708_PI430048170	0.0180796	0.481352	9.266	9.68895	11.4572	11.0309	9.90662	10.9042	11.9543	11.7637	11.5698	12.065	11.3359	10.8156	LNCV6_134708_PI430048170	mRNA	CCGTAGGCTTGAACATGTGTTGAGTGCATGAAAAATAAATGCTGTTCATGTGTGTAGCTC	NM_020201	RefSeq	chr17	+	17303365	17347663	NT5M	56953	5',3'-nucleotidase, mitochondrial	GO:0009223|GO:0046079|GO:0055086|GO:0044281|GO:0046872|GO:0005739|GO:0006260|GO:0046135|GO:0000166|GO:0005759|GO:0016311|GO:0008253|GO:0008252|GO:0006206	.	NA	-	.
LNCV6_134073_PI430048170	0.0470748	0.475886	3.99153	5.67376	6.67698	4.22194	2.17099	4.33712	6.47773	6.57905	6.3679	5.34868	6.37526	5.80148	LNCV6_134073_PI430048170	mRNA	TTTACCCTGTAATCCAAGCGTTAATAGTTTGTTAGAAGATGGGTTATTGCATGTCACTTT	NM_020775	RefSeq	chr1	+	109113962	109206781	KIAA1324	57535	KIAA1324, transcript variant 1	GO:0005802|GO:0005887|GO:0005770|GO:0031902|GO:0016236|GO:2001240|GO:2000786|GO:0044090|GO:0005765|GO:0005764|GO:0070062|GO:0009267	.	NA	-	.
LNCV6_140288_PI430048170	0.014462	0.475744	7.85865	6.48641	5.91116	7.05241	6.28488	6.85884	7.08113	8.03227	7.82986	7.49894	7.73424	8.88014	LNCV6_140288_PI430048170	mRNA	GGAAGAAGCAGATGAGAAACTCTTGAGATCTTGGTCCTGTGTTTTTTCTGCCACCAAAGG	NM_004778	RefSeq	chr11	-	60850924	60855971	PTGDR2	11251	prostaglandin D2 receptor 2	GO:0043005|GO:0045745|GO:0019722|GO:0005886|GO:0004930|GO:0007268|GO:0004956|GO:0007193|GO:0004958|GO:0006955|GO:0042923|GO:0006935|GO:0007186|GO:0005887|GO:0007187|GO:0007218|GO:0001785	.	NA	-	.
LNCV6_91687_PI430048170	0.036415	0.473966	1.29919	1.28262	2.07428	2.06234	1.39586	2.152	3.23183	3.66052	1.89612	2.81897	2.86692	1.50487	LNCV6_91687_PI430048170	mRNA	ACTCCAGAGCAGATGCCAGCTCAGGAGACTGGGACACTGAAAATTGCCAGACCCTGGAGA	NM_001294335	RefSeq	chr1	-	31727104	31764063	ADGRB2	NA	adhesion G protein-coupled receptor B2, transcript variant 1	NA	.	NA	-	.
LNCV6_136565_PI430048170	0.0268268	0.469183	3.96007	3.74407	1.77868	3.19176	1.32614	3.39314	4.21679	4.13403	4.35683	3.94277	4.36449	4.56285	LNCV6_136565_PI430048170	mRNA	TATTATGCCTGAATGACTCCACTGTTTTTCTCTAATGCTTGATTTAGGTAGCCTTGTGTT	NM_006209	RefSeq	chr8	-	119557076	119638866	ENPP2	5168	ectonucleotide pyrophosphatase/phosphodiesterase 2, transcript variant 1	GO:0005886|GO:0090305|GO:0004551|GO:0006928|GO:0006796|GO:0005615|GO:0006955|GO:0004528|GO:0006935|GO:0004622|GO:0047391|GO:0005044|GO:0030334|GO:0005509|GO:0045765|GO:0003676|GO:0006898|GO:0007186|GO:0016787|GO:0005887|GO:0008270|GO:0030247|GO:0034638|GO	.	NA	-	.
LNCV6_130927_PI430048170	0.0382135	0.467665	2.69608	2.25307	3.15623	3.44578	3.86715	1.97417	3.93672	3.83906	3.55282	3.38019	5.44127	3.43224	LNCV6_130927_PI430048170	mRNA	GTGCTTTGTCTTTCTCCAGATTAATATCGGTTACACTGCTGATGTTTGTAAATTAAACAG	NM_004787	RefSeq	chr4	+	20253563	20620561	SLIT2	9353	slit homolog 2 (Drosophila), transcript variant 1	GO:0001656|GO:0005515|GO:0001657|GO:0090260|GO:0071676|GO:0030308|GO:0048846|GO:0005615|GO:0048495|GO:0071672|GO:0042803|GO:0042802|GO:0016337|GO:0070100|GO:0007411|GO:0030837|GO:0070062|GO:0021972|GO:0030336|GO:0009986|GO:0005509|GO:0043394|GO:0060763|GO	.	NA	-	.
LNCV6_106664_PI430048170	0.0215964	0.466701	3.37163	3.88008	1.24209	3.37506	3.1097	3.12551	3.9325	3.86636	4.10041	4.44271	3.9525	5.08691	LNCV6_106664_PI430048170	mRNA	GAGTCATTTAAGGCTGCAAGCAGTATTTACAACAGAGGGTACAAGTTCTATCTGAAAAAA	NM_001024630	RefSeq	chr6	+	45328316	45551082	RUNX2	860	runt-related transcription factor 2, transcript variant 1	GO:0071773|GO:0005515|GO:0010467|GO:0000790|GO:0008284|GO:0003700|GO:0006367|GO:0045879|GO:0048701|GO:0005737|GO:0002063|GO:0070491|GO:0042475|GO:0048469|GO:0032332|GO:0005667|GO:0019904|GO:0002051|GO:0043425|GO:0030509|GO:0000978|GO:0000979|GO:0005524|GO	.	NA	-	.
LNCV6_134120_PI430048170	0.00607191	0.464876	2.45234	2.49846	2.19879	1.4536	2.67422	1.43016	3.86706	3.6072	3.41786	3.09452	3.07015	2.26824	LNCV6_134120_PI430048170	mRNA	AGGATTTCATTCTAAGCAGGGGCTACAGGACGCCACGTTTCCTTGAGAATATGTATATCG	NM_001242936	RefSeq	chr4	+	76214039	76283783	FAM47E	100129583	family with sequence similarity 47, member E, transcript variant 2	NA	.	NA	-	.
LNCV6_131731_PI430048170	0.0359327	0.46446	9.81995	8.4578	9.39898	10.9115	8.89433	11.0009	9.70606	11.8872	11.3169	11.1023	11.2707	10.8893	LNCV6_131731_PI430048170	mRNA	GTGGCCCGTTGAAATGTTGGTGGCACTTAATAAATATTAGTAAATCCTTCAAAGACAAAA	NM_031310	RefSeq	chr19	-	17351447	17377349	PLVAP	83483	plasmalemma vesicle associated protein	GO:0005515|GO:0048471|GO:0009986|GO:0000165|GO:0005901|GO:0016021|GO:0002693|GO:0070528|GO:0042803|GO:0033209|GO:0070062	.	NA	-	.
LNCV6_130121_PI430048170	0.0340622	0.459628	2.49675	2.40362	2.08551	1.87831	3.0511	1.96553	2.81793	3.31532	2.49629	2.84371	3.40543	4.76193	LNCV6_130121_PI430048170	mRNA	GTCTGTACGAATCTGCCTTGACTGTATATTTCATACTGCCCAACAAAACAATAAAAAACA	NM_004101	RefSeq	chr5	-	76615481	76623434	F2RL2	2151	coagulation factor II (thrombin) receptor-like 2, transcript variant 1	GO:0005515|GO:0016324|GO:0005886|GO:0070493|GO:0015057|GO:0007596|GO:0005887|GO:0004435|GO:0008152|GO:0009611|GO:0030168|GO:0005576	.	NA	-	.
LNCV6_144986_PI430048170	0.0344099	0.459542	1.27389	1.31149	1.2653	1.61061	1.26859	1.24815	3.1582	3.29818	1.8299	2.18551	1.2622	1.88142	LNCV6_144986_PI430048170	mRNA	ATCCTCAGAAAGTGCAGCATGGAGGAAAATCTGAACTCTAAGCAGAAGACTCTCCACTGA	NM_012134	RefSeq	chr1	-	201896455	201946588	LMOD1	25802	leiomodin 1 (smooth muscle)	GO:0006936|GO:0016020|GO:0030239|GO:0005865|GO:0007015|GO:0003779|GO:0005523|GO:0051694|GO:0005829	.	NA	-	.
LNCV6_142418_PI430048170	0.00585667	0.457815	1.32936	1.95954	1.30373	1.41093	1.42478	1.3073	1.36847	2.79497	2.74087	2.46218	3.11039	2.60911	LNCV6_142418_PI430048170	mRNA	TGAACAAGAAAATCCATCCTCTGGTAGGTTAGACTTTACACTGTGGTTTATAATATAAGC	NM_031952	RefSeq	chr5	-	95658315	95683010	SPATA9	83890	spermatogenesis associated 9, transcript variant 1	GO:0007275|GO:0016021|GO:0007283|GO:0030154	.	NA	-	.
LNCV6_129604_PI430048170	0.0094496	0.452732	8.5586	7.58739	7.87015	7.51778	6.50668	7.85271	8.50326	8.85686	7.91522	9.62358	9.20038	8.79968	LNCV6_129604_PI430048170	mRNA	GCTGTGGTCTCAGCAATGCACCTGTTTTGTACATGATTGTGTAATTTAAAGGTATATAAA	NM_020804	RefSeq	chr6	+	34466060	34535223	PACSIN1	29993	protein kinase C and casein kinase substrate in neurons 1, transcript variant 1	GO:0008092|GO:0005515|GO:0043005|GO:0048471|GO:0030054|GO:0030137|GO:0005886|GO:0097320|GO:0045202|GO:0005829|GO:0005737|GO:0005543|GO:0030100|GO:0007010|GO:0045806|GO:0007015|GO:0043679|GO:0030659|GO:1900006|GO:0031988|GO:0032587|GO:0048488|GO:0072657|GO	.	NA	-	.
LNCV6_142185_PI430048170	0.0482586	0.446657	4.45141	3.91712	2.33517	2.88105	1.55724	2.96507	5.19868	4.4452	5.21571	3.80476	4.138	2.89036	LNCV6_142185_PI430048170	mRNA	AAGAAGAGCTAATTATGCAAAAGTGGCTTTCTCACTTATTCTGTTACAGAATACGGAACC	NM_001130711	RefSeq	chr12	-	9913226	9932381	CLEC2A	NA	C-type lectin domain family 2, member A, transcript variant 1	NA	.	NA	-	.
LNCV6_77722_PI430048170	0.0186431	0.441101	1.19173	1.19615	1.19259	1.22043	1.24939	1.19439	2.20055	3.15185	2.96096	2.23634	1.58641	1.28045	LNCV6_77722_PI430048170	mRNA	TTACACCATTGTCACGGGCTTGTATCCAGAGTCACATGGCATCATTGACAATAATATGTA	NM_005021	RefSeq	chr6	+	131637301	131747410	ENPP3	5169	ectonucleotide pyrophosphatase/phosphodiesterase 3	GO:0048471|GO:0090305|GO:0004551|GO:0009143|GO:0006796|GO:0003676|GO:0006898|GO:0046872|GO:0030505|GO:0006955|GO:0004528|GO:0047429|GO:0005887|GO:0030247|GO:0035529|GO:0070062|GO:0005044	.	NA	-	.
LNCV6_136071_PI430048170	0.0473057	0.42956	5.22184	3.35523	3.54853	1.80373	1.43683	1.42287	3.38679	4.75568	4.172	5.78862	3.65338	5.13955	LNCV6_136071_PI430048170	mRNA	CTAATGAAGTATGGGAACTAAATTGCTGGTTTTCTAAGATAAGATATGGGATATGGGTCA	NM_198182	RefSeq	chr2	+	9951662	10002284	GRHL1	29841	grainyhead-like 1 (Drosophila)	GO:0003700|GO:0005794|GO:0006357|GO:0005634|GO:0007275|GO:0044281|GO:0000978|GO:0006351|GO:0043231|GO:0043565|GO:0001077|GO:0005737|GO:0045944|GO:0005654|GO:0044255	.	NA	-	.
LNCV6_127995_PI430048170	0.0189069	0.425317	6.01224	4.9606	5.43988	4.94151	4.71232	4.27984	6.47363	6.37161	5.0725	7.39445	5.59246	6.40539	LNCV6_127995_PI430048170	mRNA	ATGGACTATCCATTAGAGCAACTTTCTGGGGCCTAATAAAACTGATGTGAAACTAAAAAA	NM_030657	RefSeq	chr19	-	51379908	51387956	LIM2	3982	lens intrinsic membrane protein 2, 19kDa, transcript variant 1	GO:0005212|GO:0030054|GO:0007043|GO:0016021	.	NA	-	.
LNCV6_144012_PI430048170	0.0430272	0.422443	2.15039	2.71768	4.25479	3.59341	1.22991	1.18139	4.26738	3.00066	2.76251	4.30653	4.76119	4.89784	LNCV6_144012_PI430048170	mRNA	CTTGTAAAAGCCACATATCCACATCTCTTTCATTTTTCTCAGTGTGTTATGCAGCAATTT	NM_001291832	RefSeq	chr2	+	238159007	238168891	FAM132B	151176	family with sequence similarity 132, member B	GO:0006879|GO:0005179|GO:2000193|GO:0005576|GO:0019217|GO:0005615|GO:0042803	.	NA	-	.
LNCV6_127067_PI430048170	0.0436927	0.420279	4.97056	4.7187	4.01534	4.60858	1.20011	5.18737	5.66982	5.44185	5.55512	6.08213	5.49278	6.16538	LNCV6_127067_PI430048170	mRNA	CTTCAATGTTTTCATGAATGTTACCCAAAAAGCTGTGTTTTCTTTGGTCAGAGGTCAAAA	NM_001289864	RefSeq	chr1	+	7784428	7845180	PER3	8863	period circadian clock 3, transcript variant 5	GO:0005515|GO:0007165|GO:0005737|GO:0045187|GO:0005634|GO:0004871|GO:0000122|GO:0019900|GO:0032922|GO:0031625|GO:0006351	.	NA	-	.
LNCV6_129927_PI430048170	0.013556	0.420065	3.53964	2.25553	3.17879	2.82115	1.16188	3.63587	3.83121	4.10652	3.61805	4.06039	4.18159	5.07827	LNCV6_129927_PI430048170	mRNA	GGGATGGAGTTAGAACCTTAATGATAATTTCTTTCGTTTGGTGTAGGTTTTAGAGATTTG	NM_012244	RefSeq	chr14	-	23125294	23183660	SLC7A8	23428	solute carrier family 7 (amino acid transporter light chain, L system), member 8, transcript variant 1	GO:0005515|GO:0019534|GO:0006520|GO:0015695|GO:0005886|GO:0006865|GO:0009636|GO:0050900|GO:0055085|GO:0015101|GO:0055065|GO:0016323|GO:0015804|GO:0005737|GO:0015171|GO:0005887|GO:0007596|GO:0042605|GO:0006810|GO:0015175|GO:0015179|GO:0070062|GO:0006811	.	NA	-	.
LNCV6_144300_PI430048170	0.00356204	0.418286	5.22337	4.15678	4.77488	5.08954	3.78471	5.57137	6.12068	5.85199	5.46609	6.77317	6.42258	5.87599	LNCV6_144300_PI430048170	mRNA	GGGTAGTGGTGAAGGACCGATATCAGAAAAATGCCTTCAAGTGTACTAATTTATTAATAA	NM_014452	RefSeq	chr6	-	47231526	47309947	TNFRSF21	27242	tumor necrosis factor receptor superfamily, member 21	GO:0005515|GO:0050852|GO:0030424|GO:2000666|GO:0001783|GO:2001180|GO:0005886|GO:0042552|GO:2000663|GO:0031226|GO:0006915|GO:0030889|GO:0044281|GO:0051402|GO:0042130|GO:0002250|GO:0048713|GO:0005887|GO:0006959|GO:0071356|GO:0097252|GO:0044255|GO:0031642	.	NA	-	.
LNCV6_135835_PI430048170	0.0214189	0.417346	1.31984	3.5578	3.04517	3.6578	1.41912	3.98612	4.03644	4.86239	4.28465	4.4485	3.93008	4.72966	LNCV6_135835_PI430048170	mRNA	CGTCATAGGCTTCTGCACGTTGGATCAACTAATGTTGTTTACAATATAGATGACATTTTA	NM_003914	RefSeq	chr13	+	36432271	36442882	CCNA1	8900	cyclin A1, transcript variant 1	GO:0005515|GO:0019901|GO:0010389|GO:0000079|GO:0007283|GO:0005829|GO:0000082|GO:0007067|GO:0000083|GO:0000086|GO:0015630|GO:0005654|GO:0000278|GO:0007141|GO:0051301	.	NA	-	.
LNCV6_129929_PI430048170	0.0149024	0.412597	2.42538	1.30913	1.5485	1.33319	1.3401	1.32119	3.55099	3.49135	2.78467	2.61286	2.5718	1.31784	LNCV6_129929_PI430048170	mRNA	GACAAACTTTTTGTAAAAAGCACCATCTCTGGACTTACTTGCATTAAATATTTTCAGGGG	NM_152536	RefSeq	chr3	+	14818961	14934565	FGD5	152273	FYVE, RhoGEF and PH domain containing 5	GO:0005515|GO:0005794|GO:0030036|GO:0031267|GO:0005783|GO:0008360|GO:0032587|GO:0001726|GO:0046872|GO:0030027|GO:0043088|GO:0043547|GO:0005085|GO:0005737|GO:0032321|GO:0007010|GO:0046847|GO:0005089|GO:0005856|GO:0005769	.	NA	-	.
LNCV6_135755_PI430048170	0.0117803	0.408228	1.19322	1.1888	1.19063	2.16781	1.20768	1.93072	1.17874	3.15883	2.49382	3.10541	3.30881	2.89481	LNCV6_135755_PI430048170	mRNA	GCCAACACAATCACCTTTACTTTGTACTCTGTGTGTATGTTTTGGTTTTCTGTGTTTTAA	NM_015557	RefSeq	chr1	-	6101786	6180134	CHD5	26038	chromodomain helicase DNA binding protein 5	GO:0000792|GO:0008026|GO:0060850|GO:0008285|GO:0006366|GO:0005634|GO:0003677|GO:0005524|GO:0016020|GO:0016581|GO:0043967|GO:0008270|GO:0021895|GO:0035093	.	NA	-	.
LNCV6_134830_PI430048170	0.0230898	0.402641	2.74385	2.36442	4.13273	3.9674	3.53188	3.79982	6.09545	4.90729	4.00726	3.76737	4.22042	4.8295	LNCV6_134830_PI430048170	mRNA	TCTAATTTGTGCGTGTGTGGACTCACTATGGAAATAAAATGCAGTAGAAAGAGCATGTAA	NM_033337	RefSeq	chr3	+	8733799	8746765	CAV3	859	caveolin 3, transcript variant 1	GO:0005515|GO:0030018|GO:0031594|GO:0008016|GO:0010831|GO:0051394|GO:0031122|GO:0060307|GO:0032403|GO:0030154|GO:0070836|GO:0060373|GO:0016010|GO:0051926|GO:0017015|GO:0071253|GO:0086005|GO:0051647|GO:0042632|GO:0009986|GO:0060762|GO:0007520|GO:0033292|GO	.	NA	-	.
LNCV6_129873_PI430048170	0.0454787	0.396434	7.47688	5.71129	4.50301	6.86146	4.34552	6.8834	6.31601	7.95654	7.94345	6.94806	6.94457	8.84624	LNCV6_129873_PI430048170	mRNA	TTGTTTTACGCTAAAGATGGAAAAGAACTAGGACTGAACTATTTTAAATAAAATATTGGC	NM_001140	RefSeq	chr17	-	4630918	4641665	ALOX15	246	arachidonate 15-lipoxygenase	GO:0005515|GO:0019369|GO:0006646|GO:0034976|GO:0005886|GO:0010811|GO:0035358|GO:0044281|GO:0030282|GO:0006691|GO:0035963|GO:0005829|GO:0006954|GO:0030838|GO:0071277|GO:0034116|GO:0070374|GO:2001303|GO:0002820|GO:0005811|GO:0005506|GO:0019372|GO:0005546|GO	.	NA	-	.
LNCV6_139013_PI430048170	0.0075064	0.37871	5.13334	3.85113	4.21385	4.36999	5.09144	4.39743	6.17168	6.50519	4.31015	5.74915	6.09742	6.22963	LNCV6_139013_PI430048170	mRNA	AACCTTGATGAGCGTTGTGCGATAATAAATTTCCGTTCTTCAGAAGAATGGGGCTGGAAT	NM_130441	RefSeq	chr12	-	7729414	7749473	CLEC4C	170482	C-type lectin domain family 4, member C, transcript variant 1	GO:0045087|GO:0030246|GO:0016021	.	NA	-	.
LNCV6_136499_PI430048170	0.0297826	0.354615	5.74111	5.96393	4.75502	4.79293	3.14049	5.42789	5.38362	5.55697	7.08874	5.80071	7.7682	7.00834	LNCV6_136499_PI430048170	mRNA	GCACTACTAACATTTCAATATATTTTCTCCCAGATTTTCAGTAAAGACTTTCAGGCAGTG	NM_033017	RefSeq	chr7	-	99890406	99919600	TRIM4	89122	tripartite motif containing 4, transcript variant alpha	GO:0070206|GO:0005737|GO:0005886|GO:0045087|GO:0016874|GO:0008152|GO:0008270	.	NA	-	.
LNCV6_131056_PI430048170	0.0137826	0.346142	4.07104	1.60283	1.70132	2.38347	4.91841	3.37411	4.37235	5.73648	4.53113	5.36208	4.83381	5.01456	LNCV6_131056_PI430048170	mRNA	ATAGATCAAATGCCCTAAAATGTAGTGACCCGTGAAAAGGACAAATAAAGCAATGAATAC	NM_054023	RefSeq	chr5	+	147878710	147882193	SCGB3A2	117156	secretoglobin, family 3A, member 2	GO:0071682|GO:0005576|GO:0006898	.	NA	-	.
LNCV6_79459_PI430048170	0.0496566	0.327113	9.02722	5.91934	5.3456	6.2507	7.2801	6.08855	6.10546	8.71953	8.89924	9.8952	7.40072	9.51416	LNCV6_79459_PI430048170	mRNA	AATACACTTTTGAGATTTTCGATGGCAAAGACAACCATCAACGCTCCCTTGACCTGTCCG	NM_003970	RefSeq	chr8_KI270821v1_alt	+	228367	328590	MYOM2	9172	myomesin 2	GO:0005739|GO:0005515|GO:0032982|GO:0006936|GO:0008307|GO:0031430	.	NA	-	.
LNCV6_143764_PI430048170	0.000479646	0.327014	1.39233	1.57691	1.35651	1.35893	1.40942	2.15468	3.70057	2.83368	3.60325	3.15281	2.10789	3.18199	LNCV6_143764_PI430048170	mRNA	TAAAAGTGACACTGAGCAAATAACCTCATCAGGTTATATTTGCCCACATACCCTAAGCAC	NM_198474	RefSeq	chr11	+	7485368	7511375	OLFML1	283298	olfactomedin-like 1	GO:0005576	.	NA	-	.
LNCV6_128073_PI430048170	0.0220097	0.325423	5.62336	5.29649	4.62488	5.72436	1.84676	5.68055	6.81518	7.41946	6.78962	6.55289	6.55537	6.59714	LNCV6_128073_PI430048170	mRNA	TGATTTATGTTGGCGAGTCTGAGAGCAAGCCCAAATGTGTTCTTCAAAGGACAATGGGAA	NM_006138	RefSeq	chr11	+	60056627	60071115	MS4A3	932	membrane-spanning 4-domains, subfamily A, member 3 (hematopoietic cell-specific), transcript variant 1	GO:0005515|GO:0048471|GO:0051726|GO:0016021|GO:0012505	.	NA	-	.
LNCV6_142563_PI430048170	0.00538963	0.304839	8.17379	5.63273	6.23499	7.26576	7.38271	7.13885	7.89325	8.75867	8.67867	8.42733	8.28159	10.1493	LNCV6_142563_PI430048170	mRNA	GAGATAGCGAAGGGTCTGGCCTCGCTGTGATCTGATTTGGGATTAAAGGTTTGGAAATTT	NM_145814	RefSeq	chr19	+	53992287	54012666	CACNG6	59285	calcium channel, voltage-dependent, gamma subunit 6, transcript variant 1	GO:0005245|GO:0070588|GO:0034765|GO:0006816|GO:0005891	.	NA	-	.
LNCV6_128487_PI430048170	0.0147724	0.299677	5.48019	4.17223	5.44785	3.27974	1.47929	3.49236	6.02561	5.55038	5.48435	6.12596	7.10498	6.12417	LNCV6_128487_PI430048170	mRNA	CAGATTTGTACAAGTATTGGATGATTCCTTGAGTTTACAGCTGTACAAATAGTGTGGAAA	NM_002508	RefSeq	chr1	-	235975831	236065181	NID1	4811	nidogen 1	GO:0005509|GO:0005518|GO:0010811|GO:0005605|GO:0043394|GO:0005576|GO:0032836|GO:0071944|GO:0005604|GO:0031012|GO:0007160|GO:0022617|GO:0030198|GO:0043237|GO:0043236|GO:0071711|GO:0070062	.	NA	-	.
LNCV6_145484_PI430048170	0.000239697	0.297614	4.8919	4.23574	5.61827	5.44766	4.31473	5.42483	6.35727	7.12098	6.64853	6.63182	7.02227	7.07997	LNCV6_145484_PI430048170	mRNA	TTCCTGCTTCTCTAGGCAAGGTCCCGTCATAGCAATTATATTTATTATCCCTTGAAAAAA	NM_002529	RefSeq	chr1	+	156860878	156881850	NTRK1	4914	neurotrophic tyrosine kinase, receptor, type 1, transcript variant 2	GO:0005515|GO:0021553|GO:0010465|GO:0046579|GO:0048678|GO:0042803|GO:0043068|GO:0043524|GO:0060009|GO:0046777|GO:0007411|GO:0051602|GO:0007611|GO:0043025|GO:0031667|GO:0070374|GO:0005166|GO:0048406|GO:0009986|GO:0051968|GO:0007568|GO:0018108|GO:0071316|GO	.	NA	-	.
LNCV6_138903_PI430048170	0.0015785	0.273578	1.52191	1.48989	1.94885	2.16998	2.0037	2.07228	2.90865	3.94358	3.78747	4.09509	2.46679	4.4616	LNCV6_138903_PI430048170	mRNA	ACGGTCAGCGCTGGAAACTTCTATTAAATGGATGCATTCTGGAGGCATGAAGTTAAAAAA	NM_020822	RefSeq	chr9	+	135702184	135793147	KCNT1	57582	potassium channel, sodium activated subfamily T, member 1, transcript variant 1	GO:0008076|GO:0005249|GO:0015269|GO:0071805	.	NA	-	.
LNCV6_137943_PI430048170	3.13823e-05	0.247192	3.39032	4.7054	3.74185	3.52035	3.61203	4.19333	6.09994	5.57978	5.20626	5.66656	6.5044	6.26791	LNCV6_137943_PI430048170	mRNA	GCTGTGAGGCCATAGGTACTAGACAACCAATACATGCAGGGTTGGGTTTTCTAATTTTTT	NM_003015	RefSeq	chr10	-	97766750	97771999	SFRP5	6425	secreted frizzled-related protein 5	GO:0051898|GO:0042813|GO:0017147|GO:0008285|GO:0004930|GO:0090179|GO:0006915|GO:2000057|GO:0048546|GO:0005615|GO:0009653|GO:0035414|GO:0043433|GO:0030154|GO:0060028|GO:2000041|GO:0007165|GO:0007163|GO:0016021|GO:0043508|GO:0090090|GO:0007601|GO:0035567	.	NA	-	.
LNCV6_145281_PI430048170	0.029947	0.242149	1.43905	1.57732	1.21655	1.20994	1.41665	2.71115	1.21766	4.27841	2.81932	2.41202	3.9106	4.98133	LNCV6_145281_PI430048170	mRNA	CCTCTTTTGGTGTCTTAAGGCTTTTTGAAGCTTATTTTACTGTGAGTTTATTGGGAGTAT	NM_152709	RefSeq	chr10	+	68827536	68893060	STOX1	219736	storkhead box 1, transcript variant 1	GO:0005737|GO:0005730|GO:0005654|GO:0005634|GO:0003677	.	NA	-	.
LNCV6_144004_PI430048170	0.0031111	0.232505	9.49808	9.55166	10.9647	11.8046	9.51203	11.6274	13.3537	13.1903	13.1943	12.5265	13.2689	11.0412	LNCV6_144004_PI430048170	mRNA	TTGTGGAGAGGTCTTAAACTCCCCATTTCCTTGTTTTGCTGCAATAAACTGCATTTGAAA	NM_006121	RefSeq	chr12	-	52674735	52680407	KRT1	3848	keratin 1, type II	GO:0005515|GO:0005886|GO:0061436|GO:0045765|GO:0072562|GO:0005634|GO:0005615|GO:0001867|GO:0031012|GO:0016020|GO:0001895|GO:0005198|GO:0050728|GO:0030246|GO:0004872|GO:0045095|GO:0005856|GO:0042730|GO:0006979|GO:0070062	.	NA	-	.
LNCV6_134719_PI430048170	0.000586406	0.232496	2.3293	3.28056	3.76828	4.04442	3.81418	4.82138	6.07336	6.49825	5.6638	5.96762	5.58949	5.80569	LNCV6_134719_PI430048170	mRNA	CCAGAAAGCCCTCTTTTTCGCACCTCATCAAACAGAACAAATAAGTTATATTTAATGTCT	NM_032681	RefSeq	chr11	+	55883296	55891808	TRIM51	84767	tripartite motif-containing 51	GO:0005622|GO:0008270	.	NA	-	.
LNCV6_140024_PI430048170	0.000121236	0.217056	1.33499	2.36641	1.99063	1.17284	1.17752	2.75043	4.82059	4.69814	3.5688	3.98515	3.61671	3.49981	LNCV6_140024_PI430048170	mRNA	CAGCAGATGTCTTAATCTTTCCGAGATCTAGTTTTTCAGCAAAGCAGGATTTAAGAAATG	NM_001281834	RefSeq	chr1	+	247507057	247577690	GCSAML	148823	germinal center-associated, signaling and motility-like, transcript variant 2	NA	.	NA	-	.
LNCV6_134510_PI430048170	2.10518e-05	0.206777	4.62408	4.67518	4.17957	4.34856	3.26724	4.86363	6.0568	7.01296	6.51316	7.22497	6.40303	6.57049	LNCV6_134510_PI430048170	mRNA	GGCAATCTCATGGTTAAATGACTTCCCTTTGAGCTCTTTAATTATTGGCAATAAACAACT	NM_001007544	RefSeq	chr1	+	206052722	206102459	C1orf186	440712	chromosome 1 open reading frame 186	GO:0005886|GO:0016021	.	NA	-	.
LNCV6_135302_PI430048170	0.010887	0.200213	4.90433	5.52041	5.95806	5.79357	1.49981	6.222	7.5181	8.28342	7.69348	7.72533	7.96421	7.57067	LNCV6_135302_PI430048170	mRNA	TTAGCGGGGTGAATATTTTATACTGTAAGTGAGCAATCAGAGTATAATGTTTATGGTGAC	NM_033102	RefSeq	chr1	-	205657852	205680502	SLC45A3	85414	solute carrier family 45, member 3	GO:0016021|GO:0055085	.	NA	-	.
LNCV6_134284_PI430048170	0.00314928	0.19688	1.17073	1.17262	3.35675	3.68048	1.18311	3.44278	6.37471	5.20804	4.37391	4.58126	3.84646	4.79712	LNCV6_134284_PI430048170	mRNA	CTATTAGTAGAACCAAATTTCTAAGCTGTGGCGTGCTGAAAATAAAATGCTTATGAAGCA	NM_001463	RefSeq	chr2	-	182833275	182866770	FRZB	2487	frizzled-related protein	GO:0042813|GO:0017147|GO:0010721|GO:0030308|GO:0043065|GO:0008285|GO:0004930|GO:0030178|GO:0005615|GO:0070367|GO:0060029|GO:0061053|GO:0001501|GO:0016020|GO:0014033|GO:0045600|GO:0090103|GO:0061037|GO:0016021|GO:0090090|GO:0035567	.	NA	-	.
LNCV6_143541_PI430048170	0.00227459	0.186363	3.33476	1.34815	1.34178	1.73085	3.62003	1.40295	3.33852	5.96737	4.73911	5.51461	4.50885	3.52376	LNCV6_143541_PI430048170	mRNA	CCTTGTGCCTTATCAAACAGGACAAATACGTTCTGTTTTATGTCTTGAATTGCATTCTAA	NM_001105522	RefSeq	chr11	+	89924063	89933061	TRIM49D2	NA	tripartite motif containing 49D2	NA	.	NA	-	.
LNCV6_137387_PI430048170	2.02392e-05	0.177789	2.13971	2.15388	2.84622	1.9106	1.17984	2.72096	5.34679	4.70018	4.89984	4.1161	5.00755	3.92459	LNCV6_137387_PI430048170	mRNA	CCTCTAGTCGAAGACAATATTTGATTCCTAGTTCTGTTTGGGGCAAATTTTCATTTATCT	NM_005100	RefSeq	chr6	+	151239998	151358561	AKAP12	9590	A kinase (PRKA) anchor protein 12, transcript variant 1	GO:0005515|GO:0005886|GO:0008179|GO:0030819|GO:0006605|GO:0010739|GO:0005737|GO:0007186|GO:0090036|GO:0005856|GO:0051018|GO:0005925|GO:0005938	.	NA	-	.
LNCV6_133945_PI430048170	0.0318413	0.167807	4.21123	4.45604	2.11992	4.65777	1.35593	4.24403	5.32118	7.83059	6.50677	2.55391	6.2294	6.73094	LNCV6_133945_PI430048170	mRNA	GGCTTTAGAGAGCAATCTTTGTATGACACCAGAAAACTCTTCATGCTATTGAATGATAAA	NM_001165032	RefSeq	chr6	+	13924866	13980009	RNF182	221687	ring finger protein 182, transcript variant 1	GO:0005515|GO:0005737|GO:0004842|GO:0016567|GO:0016874|GO:0008270|GO:0016021	.	NA	-	.
LNCV6_134455_PI430048170	0.0100991	0.146825	3.14536	3.35315	3.4137	1.52852	1.53314	1.47705	3.37385	7.10779	3.49416	5.88287	4.65941	4.0805	LNCV6_134455_PI430048170	mRNA	GTCCATGATATTTGCTAAGCTAGGTGTGTCTAAGAGTATTTTAAACCCTTATGGATTTTC	NM_001130103	RefSeq	chr10	+	69801887	69959148	COL13A1	1305	collagen, type XIII, alpha 1, transcript variant 1	GO:0005515|GO:0005886|GO:0005576|GO:0005600|GO:0030154|GO:0001958|GO:0016337|GO:0007160|GO:0022617|GO:0030198|GO:0005911|GO:0030574|GO:0005788|GO:0008201|GO:0001763	.	NA	-	.
LNCV6_143037_PI430048170	0.00449612	0.140393	4.62981	6.37799	6.85284	6.44786	2.66324	7.18123	8.68718	9.37818	8.97039	9.07186	8.90575	9.44238	LNCV6_143037_PI430048170	mRNA	TCTGTGGTTCAGCTTGTGACATGATATATAACACAGAAATAAATTATGCTTGTCCCTGAA	NM_002112	RefSeq	chr15	-	50241948	50265965	HDC	3067	histidine decarboxylase	GO:0001694|GO:0034641|GO:0006547|GO:0030170|GO:0006548|GO:0044281|GO:0004398|GO:0042423|GO:0005829	.	NA	-	.
LNCV6_141627_PI430048170	0.00256574	0.135607	5.11718	6.4048	6.98188	6.09676	2.99508	7.00776	8.65017	9.4806	9.14082	8.65659	9.52631	8.97655	LNCV6_141627_PI430048170	mRNA	CAGAAGTAACTTATTTTGTACTAGTGTCCGCATAAGAAAAAGAATCGGCAGTATTTTCTG	NM_001145661	RefSeq	chr3	-	128479421	128488530	GATA2	2624	GATA binding protein 2, transcript variant 1	GO:0006909|GO:0005515|GO:0021514|GO:0021533|GO:0003700|GO:0045599|GO:0001655|GO:0021983|GO:0070345|GO:0035065|GO:0060872|GO:0050766|GO:0045654|GO:0048873|GO:0045944|GO:0048469|GO:0021902|GO:0035019|GO:0097154|GO:0045746|GO:2000178|GO:0042472|GO:0001709|GO	.	NA	-	.
LNCV6_128219_PI430048170	0.000124599	0.125832	3.68145	5.44626	4.55472	3.89786	3.07115	3.91881	7.29482	7.47279	7.33038	7.34603	6.86897	7.37066	LNCV6_128219_PI430048170	mRNA	CCTTCAGTTTCTCACAGATTTTCACCATGTGGCTTCATCAATTTATGTGCTAATACAATA	NM_001870	RefSeq	chr3	+	148865255	148897085	CPA3	1359	carboxypeptidase A3 (mast cell)	GO:0030133|GO:0002003|GO:0006508|GO:0008270|GO:0005576|GO:0030141|GO:0044267|GO:0004181	.	NA	-	.
