# Supplementary material for: Chronic Stress-Induced Gene Changes In Vitro and In Vivo: Potential Biomarkers Associated With Depression and Cancer Based on circRNA- and lncRNA-Associated ceRNA Networks
Source: Front Oncol. 2021 Sep 28;11:744251. doi: 10.3389/fonc.2021.744251 (PMC8507324; doi:10.3389/fonc.2021.744251)
Supplement: Supplementary file 5 [file Table_9.xlsx]

## Sheet: Sheet1
Supplementary Table9: tumor-related genes in ceRNA networks
mRNA	miRNA	lncRNA
HDC	miR-940	ENST00000440698
HIST1H4D	miR-2392	ENST00000518822
GATA2	miR-718	ENST00000583122
S100A9	miR-320c	ENST00000623759
ENPP2	miR-1470
TNFRSF21	miR-92b-3p
FRZB	miR-4530
NTRK1
KRT1
PALM
ALOX15
LILRA5
PTGDR2
AKAP12
CPA3
SFRP5
PLVAP
ADGRG3
SLC45A3
